# Supplementary material
Source: HighWire-hosted journal article supplement (doi:10.1101/rna.078918.121)
Supplement: Supplemental_Legends.docx [file Supplemental_Legends.docx]

**SUPPLEMENTARY INFORMATION**

**SUPPLEMENTARY DATA**

Supplementary Figures S1 – S7 are separate files, and Tables S1-S9 are combined in a single Excel file.

**SUPPLEMENTARY FIGURE LEGENDS**

**Figure S1.** Reproducibility of TED-seq and 3′-seq, and association of poly(A) tail length with 3′UTR isoform usage; related to Figure 1.

1. Schematic of TED-seq library preparation (modified from Woo et al., 2018).
2. The tail length distributions of four distinct synthetic poly(A) standards, as measured by TED-seq. RNA standards with different tail lengths (Table S9) were added to a pool of poly(A)-selected RNAs. Plotted is the cumulative distribution of poly(A) tail length for each standard analyzed by TED-seq.
3. Scatterplots of 3′-seq between two biological replicates. Each point indicates 3′-seq read counts at a PAS isoform after CPM normalization (n = 23,467). Pearson correlation coefficient between biological replicates is shown at the bottom of the scatterplot. Local point density is color-coded from dark-blue to orange (low to high). Axes are log2 transformed after adding a pseudo-count of 1 to the CPM values.
4. Change in APA usage between the indicated time points, tested in individual sets of 3′-seq biological replicates. The number of 3′ terminal exons with shifts in APA isoform usages, color-coded by the switching direction; left panels for each replicate set. Changes in the weighted 3′UTR length (∆UTR) between two time points for the 3′ terminal exons with two or more PAS; right panels of each replicate set. Switching to distal APA isoforms (3′ UTR) depicted as an increase in ∆UTR, and switching to proximal APA isoforms as a decrease in ∆UTR (3′UTR lengthening and shortening, respectively). Barplots on the right panels are the mean of ∆UTR values for 3′ terminal exons with significant shifts in APA usage (FDR < 0.1, and |USI| > 0.1). USI, tandem 3′UTR switch index
5. Pie chart of the genomic locations of *de novo* PAS determined by 3′-seq (n=47,267).
6. Distance of *de novo PAS* from nearest annotated site (reference PAS).
7. Comparison of poly(A) tail length measured by TED-seq between two biological replicates. Each point indicates mean poly(A) tail length of an individual PAS isoform (mapped reads ≥ 50 counts), and colored based on the density on the scatter plot (orange: high density, blue: low density). Pearson correlation coefficient between biological replicates is shown.

**Figure S2.** Analysis of 3′UTR isoform switching and measurements of poly(A) tail length change; related to Figure 2.

1. (left) Schematic of APA isoform detection strategy and the corresponding RNA abundance. TED-seq and 3′-seq were integrated to identify APA isoforms (also known as tandem 3′UTRs). A PAS cluster represents a single APA isoform. (right) Number of tandem PAS clusters per 3′ terminal exon.
2. Schematic of strategy to identify altered APA isoform usage. See also ***Analysis of 3′UTR isoforms*** in the methods.
3. (left) Number of genes with tandem 3′UTR shift. Switching direction color-coded. (right) Gene ontologies enriched in genes with tandem 3′UTR shift with their statistical significance on x-axis.
4. Schematic of processing PAS isoforms to measure tail lengths. For a PAS isoform with one or more PASs nearby (window size: 300 nt), changes in PAS usage within the window may obscure detection of tail length changes upon stimulation. Therefore, such clustered PAS isoforms were filtered out (refer to the method section ***poly(A) tail length estimation***). Next, for clustered PASs not exhibiting altered PAS usage, minor PASs within the window, defined by 3′-seq read counts, were removed to allow TED-seq reads to be applied to a single PAS isoform.
5. Number of local PAS clusters with altered PAS usage (window size = 300 nt) for the indicated two time points. Statistical significance of altered usage of PAS isoforms in a local tandem PAS cluster between the indicated two time points were tested by Chi-squared tests (FDR <0.1). Switching directions were determined by calculating USI in a local tandem PAS cluster (yellow for distal switch, USI > 0.1; blue for proximal switch, USI < -0.1). USI, tandem 3′UTR switch index.
6. Scatterplots of mean poly(A) tail lengths (average of mean poly(A) tail lengths from two biological replicates) between the indicated time points; otherwise as described in Figure 2A.

**Figure S3.** Analysis of sequence elements associated with poly(A) tail length changes; related to Figure 2 and Figure 3.

1. The relationship between initial poly(A) tail lengths and the tail length changes (∆PAL) in the comparison of 0 h and 1 h time points. All 3′ UTR isoforms were binned into 8 groups based on their initial tail lengths. For each isoform, an average of mean poly(A) tail lengths from two biological replicates at 0 h was used as the initial tail length, which was compared to that observed at 1 h post LPS.
2. Cumulative distributions of 3′UTR AU contents (x-axis) compared between transcripts grouped by ∆PAL during indicated time intervals. AU content per 3′UTR were calculated as the count of A and U in the 3′UTR divided by the length of the 3′UTR. Transcript isoforms grouped based on ∆PAL (∆PAL ≥ 10 nt for UP, |∆PAL|<5 for NC, ∆PAL ≤ -10 for DN); ∆PAL was calculated for each transcript isoform by comparing mean PALs averaged form two biological replicates between two different time points. Statistical significance assessed by K-S test, comparing UP and DN groups. down, DN; no change, NC; up, UP.
3. Cumulative distribution of 3′UTR AU contents in genes with minimal transcriptional changes compared between transcripts grouped by ∆PAL. Minimal transcriptional change (∆TXN) was defined as |log2 ∆TXN| < -0.5. TXN values (RPKM) were averaged from two biological replicates of PRO-seq at each time point, and the fold change value between two different time point was log2-transformed for ∆TXN calculation.; otherwise as described in panel B.
4. Heatmap of Pearson correlation coefficients of ∆PAL and transcript features including codon optimality calculated separately for four different cell lines (y-axis) at indicated time intervals (x-axis). CSC scores (Wu et al., 2019) were used to calculate codon optimality.
5. Identification of 3′UTR 6-mers associated with ∆PAL at indicated time intervals. Subpanels are Volcano plots of 6-mers depleted or enriched in transcripts with ∆PAL ≥10 (UP) versus ∆PAL≤ -10 (DN). x-axis is log2 6mer fold-change (UP/DN); y-axis is K-S test p-value. Each point represents a distinct 6-mer with the size and the color indicative of -log10(FDR) and the number of A or U [n(A|U)] in the 6-mer, respectively.
6. Heatmaps of the distributions of AU content along the 3′UTR regions (columns) in each set of the transcript isoforms (rows) categorized by ∆PAL during indicated time intervals; increased PAL (∆PAL ≥ 10 nt for UP) and decreased PAL (∆PAL ≤ -10 for DN). Each column (x-axis) corresponds to consecutive 50 nt windows ordered from the PAS, and each cell contains a AU content value calculated in the given 50 nt window, and the value is color-coded between blue (low) and orange (high).

**Figure S4.** Association between transcriptional changes and changes in poly(A) tail lengths;related to Figure 3 and Figure 4.

1. Association between 3′UTR motif location and ∆PAL during activation. Number of unique 6mers associated (Student’s t-test, FDR<0.1) with ∆PAL (y-axis) in a given time interval, examined in either first or last 300 nt of 3′UTR(x-axis), and across all six time intervals (subpanels). 6mers were grouped and color-coded by number of A or U bases [n(A|U)].
2. Diagram of mechanisms that could explain increases in poly(A) tail length upon macrophage activation.
3. Scatterplots of read density per transcript isoform (RPKM) of PRO-seq between two biological replicates (n = 139,117). Each dot represents a transcript isoform, colored based on the dot density (high density in orange, and low density in blue). Pearson correlation coefficients between the biological replicates are shown on each scatterplot.
4. (left) The same analysis presented in Figure 4A applied for the comparison of 0 h and 1 h post-LPS. Cumulative distribution of ∆PAL (x-axis) with respect to transcriptional changes (∆TXN; PRO-seq log2 FC). ∆TXN was calculated as described in Figure S3C. (right) Bar-plots of mean ∆PAL (y-axis; error bars denote standard deviation) with standard deviation per ∆TXN bin (x-axis). ***, K-S test P<10-10
5. Bar-plots of mean ∆PAL (y-axis) with standard deviation per ∆TXN bin (x-axis) between 0 h and 4 h post-LPS; otherwise as described in Figure 4A (***, K-S test P<10-15).
6. Box plots of ∆PAL for transcript isoforms with PAL changes (∆PAL ≥ 10, UP; PAL ≤ -10, DN) from genes with minimal transcriptional changes (|∆TXN| < 0.5) for 0 h and 1 h comparison; otherwise as described in Figure 4B.
7. Analysis of genes with minimal ∆TXN between 0 h through 4 h (|∆TXN| < 0.5 in all pairwise time intervals). (left) Stratified random sampling equalized ∆TXN (y-axis; 0 h and 4h compared, PRO-seq log2 FC) distributions across three ∆RNA groups (log2 FC< -1 for DN, |log2 FC| <0.5 for NC, and log2 FC >1 for UP) based on ∆RNA (3′-seq log2 FC, y-axis). ∆RNA values were calculated as described in Figure 4C. Each dot indicates a transcript isoform, color-coded by ∆TXN. (right) The time-course changes in transcription (line, mean ∆TXN relative to 0 h; shade, standard deviation) for the sampled transcript isoforms (n=152/∆RNA group). down, DN; no change, NC; up, UP.

**Figure S5.** Association between changes in poly(A) tail lengths and changes in mRNA abundance;related to Figure 4.

1. (right) Cumulative distribution of ∆PAL (x-axis) during the indicated time interval, compared between transcript isoforms with minimal transcriptional changes, and grouped by change in RNA abundance, ∆RNA (3′-seq log2 FC); otherwise as described in Figure 4C and S4G. (left) ∆TXN (PRO-seq, log2 FC) distributions across the ∆RNA groups, to validate ∆TXN-matched sampling. P value (K-S test) denotes comparison between the UP and DN groups.
2. Cumulative distributions of ∆RNA (x-axis) during the indicated time intervals, compared between transcript isoforms with minimal transcriptional changes, and grouped by change in poly(A) tail length, ∆PAL (∆PAL ≥ 10, UP; |∆PAL| <5, NC; ∆PAL ≤ -10, DN); otherwise as described in panel A. P value (K-S test) denotes comparison between the UP and DN groups.
3. Association between ∆PAL and ∆RNA in THP1- cells upon LPS, corrected for transcriptional changes in the indicated time intervals. (left) Distribution of ∆TXN in ∆RNA groups after matched random sampling of the transcript isoforms with respect to ∆TXN. Transcript isoforms grouped by ∆RNA levels (log2 FC< -1 for DN, |log2 FC| <0.5 for NC, and log2 FC >1 for UP) are sampled to have equal numbers across the 3 groups. (right) Cumulative distributions comparing ∆PAL between the three ∆RNA groups for the indicated time points. P values (K-S tests) denote comparison between the UP and DN groups.
4. Association between ∆PAL and ∆RNA in THP1- cells upon LPS treatment after ∆TXN-matched sampling in transcript isoforms groups with respect to ∆PAL. Analysis is performed as described in panel C, except that transcript grouping was based on ∆PAL.
5. Time-course dynamics of transcription, poly(A) tail length, and RNA abundance for the transcript isoforms defined in Figure 4F. Lines represent average values and shades represent confidence intervals. Changes in transcription level (PRO-seq, log2 FC; ∆TXN), poly(A) tail length (TED-seq, ∆PAL), and RNA abundance (3′-seq, log2 FC; ∆RNA) are plotted relative to 0 h.
6. Time-course dynamics of transcription, poly(A) tail length, and RNA abundance for the transcript isoforms defined in Figure 4G, plotted as described in panel E.

**Figure S6.** Analysis of readenylation upon LPS stimulation; related to Figure 5.

1. Length changes of bulk poly(A) tails in the presence of Actinomycin D (ActD). Total RNA, 3′ end labelled with biotin, was digested with RNase A/T1 mix, which preferentially degrades non-poly(A) sequences. The tails were visualized by northern blotting.
2. RT-qPCR validation of transcription inhibition by Actinomycin D, performed with four technical replicates, repeated twice. Error bars indicate standard deviation.
3. Scatterplots of poly(A) tail lengths measured by TED-seq between two biological replicates following LPS stimulation and ActD treament (n=11,128 transcript isoforms from 6086 genes). Each point is the mean poly(A) tail length of a PAS isoform experimentally determined by 3′-seq.
4. Validation of PCR product sizes for completely deadenylated (A0) transcripts of interest for PAT assays.
5. Number of readenylation targets between two time points. Readenylation targets are defined as the PAS isoforms with poly(A) tail length increase greater than 5 nucleotides, determined by TED-seq from samples following LPS stimulation and ActD treament.
6. Relationship between initial tail lengths and readenylation. The 266 transcripts isoforms identified as readenylation targets by TED-seq were binned based on the initial tail (x-axis).
7. Distribution of ∆PAL for transcripts identified as readenylation targets at indicated time point comparisons (0 h vs1h, 0 h vs 2 h, and 1h vs 2 h; x-axis). Each dot indicates a transcript isoform with tail length increase that passed ∆PAL>5 nt, and K-S test FDR<0.2.
8. Distribution of ∆PAL for the 266 readenylation targets binned by initial poly(A) tail length (nt, x-axis)
9. Distribution of ∆PAL across the initial tail length bins (x-axis) for the readenylated targets with respect to time intervals.
10. Distribution of ∆TXN (y-axis; 0 to 1 hours post-activation) for transcripts undergoing and not undergoing readenylation (x axis, UP; ∆PAL>5, CTRL; ∆PAL<1, respectively) after stratified random sampling by ∆TXN. Transcripts color-coded by ∆TXN (PRO-seq, log2 FC).

**Figure S7.** Analysis of readenylation upon LPS stimulation; related to Figure 5 and Figure 6.

1. Association between ∆RNA and readenylation. (Left panels) Distribution of ∆TXN during ActD non-treated LPS stimulation in control (CTRL) vs readenylated (UP) groups. CTRL and UP groups are defined as transcripts with ∆PAL <1 and ∆PAL > 5 in actD pre-treated system upon LPS stimulation, respectively. (Right panels) Cumulative distribution plots of ∆RNA with respect to readenylation groups (CTRL and UP), as described in the left panels. Statistical significances are calculated by two-tailed K-S tests.
2. Association between ∆RNA and readenylation in genes with minimal transcriptional changes. Minimal transcriptional changes were defined as ∆TXN < 0.5 between two time points; otherwise as described in panel A.
3. Statistical significance (y-axis) of RBP motifs tested for enrichment within the 3′-terminal 300 nt of 3′UTRs of readenylated transcripts compared to control transcripts, respectively. Top 5 motifs were colored in red.
4. RBP motifs enriched within the 3′-terminal 100 nt of 3′UTRs of readenylated transcripts; otherwise as described in panel C.
5. Measurement of eGFP , TNF, and IL1B mRNA expression in the differentiated THP-1 cells stably expressing eGFP-3′UTR reporter genes by lentiviral transduction. After normalization by GAPDH levels, log2-transformed fold change relative to negative control (no transduction) values were plotted.
6. Measurement of changes in eGFP, TNF, and IL1B mRNA expression upon LPS stimulation (1h) using the systems described in panel D. Log2-transformed fold change relative to negative control (no LPS treatment) values were plotted in each of three reporter cell lines (WT, MUT-DEL, and MUT-GC) as well as original cell line (NC).
7. Cumulative distribution plots of putative ZFP36 binding site density (number of the motifs in the entire 3’UTR region divided by the 3′UTR length) in transcript isoforms with respect to poly(A) tail length changes - increase (UP), decrease (DN), or no change (NC) between 0 h and 1 h (ActD-untreated). Student t-test P-value between the UP and NC indicated.
8. ZFP36 binding across PAL clusters defined in Figure 2C. CDF of ZFP36 binding (x-axis) in 3′UTRs of transcripts in different PAL-clusters using HITS-CLIP data from CD4+ T cells after activation. Wilcoxon test P-value between cluster 4 and the rest of clusters indicated.

**SUPPLEMENTARY TABLES**

**Table S1.** Summary of PAS Located in 3′UTR and 1 kb Downstream Region (n=30141), Related to Figure 1.

For each PAS isoform determined by 3′-seq, it was assigned with transcript isoform id whose annotated PAS is the nearest to its PAS.

**Table S2.** BED12-formatted Customized Transcript Annotation, Related to Figure 1.

BED12-formatted transcript annotation was customized to terminate at 3′-seq determined PAS. The 13th column including gene name was added.

**Table S3.** RNA Abundance of All 3′UTR isoforms indexed based on their PAS positions. During Macrophage Activation, Related to Figure 1.

Each PAS isoform was assigned with tandem 3′UTR index and ALE index based on their relative location, and its relative abundance to the other PAS isoforms derived from the same gene at each time point is included in the dataset.

**Table S4.** Time-course Poly(A) Tail Length Profile, Related to Figure 2 and 3.

For each PAS isoform, the mean poly(A) tail lengths were averaged from the biological replicates.

**Table S5.** RBP motifs Aligning to the 6-mers Identified in the Last 500 nt 3’UTR Regions as Being Associated with ∆PAL upon Macrophage Activation, Related to Figure 3.

For each 6-mer identified as associated with ∆PAL, RBP with the motif score >5 were listed with the motif score.

**Table S6.** Combinatorial Effects of Two Different 6-mers in the Association with ∆PAL, Related to Figure 3.

In a set of the 6-mers whose frequency was individually identified as associated with ∆PAL in the last 500 nt 3′UTR region, All possible pairs of 6-mers were tested for the identification of two 6-mers (e.g, [A, B]), where presence of two different types ([A,B]= [1,1]; number of the tested two different 6-mers in brackets) have stronger association with ∆PAL than that of one type ([A,B]= [0,2] or [2,0]). FDR-corrected K-S test P-values for all statistical tests and the predicted RBPs that well align to given 6-mers were listed.

**Table S7.** The Integrated Datasets of Mean Poly(A) Tail Length, Transcription, and mRNA abundance, Related to Figure 4.

For each PAS isoform, mean poly(A) tail lengths, transcription, and mRNA abundance, are in the unit of nt, log2(RPKM in gene body), and CPM, respectively.

**Table S8.** Readenylation Targets Identified by TED-seq in the Actinomycin D-treated THP-1 Cells, Related to Figure 5 and 6.

PAS isoforms that passed the criteria of K-S test FDR <0.2, and ∆PAL ≥ 5 nt upon LPS stimulation were listed with the corresponding ∆PAL values in the table.

**Table S9.** Oligonucleotides or Sequences Used in This Study.
